# Supplementary material
Source: PubMed Central journal article supplement (PMC2395165)

# Supplementary Figure 1

## Origin Description

wtDS

p3487: wtDS  
p3567: wtDS

MCS-only

p3488: No Origin

4x(EBNA1-bs)

p3508: 2x(DS 1+2)  
p3509: 4xFRbs  
p3510: 4xRep\*bs  
p3511: 4xSiteIII\*bs  
p3516: S-W-W-S

4x(EBNA1-bs)+TRF2-hbs (1/2,1/2,1/2)

p3512: 2x(DS 1+2)  
p3513: 4xFRbs  
p3514: 4xRep\*bs  
p3515: 4xSiteIII\*bs

4x(EBNA1-bs)+TRF2-bs (1/2,1/2,1)

p3591: wtDS  
p3603: 4xFRbs

4x(EBNA1-bs)+TRF2-bs (1,1/2,1)

p3592: wtDS  
p3604: 4xFRbs

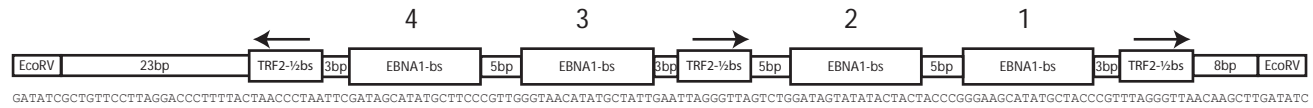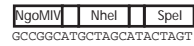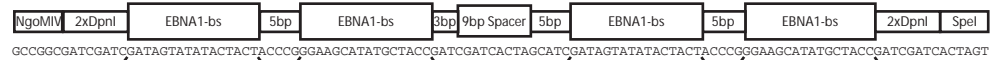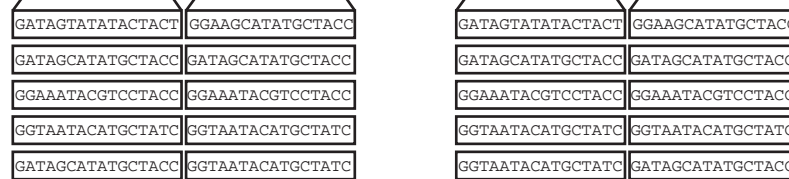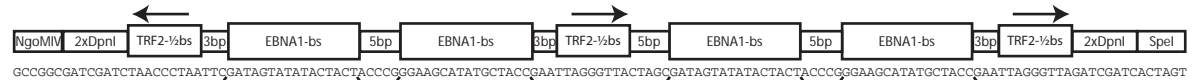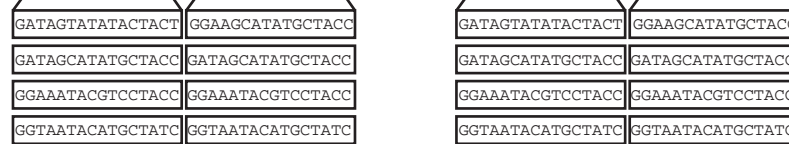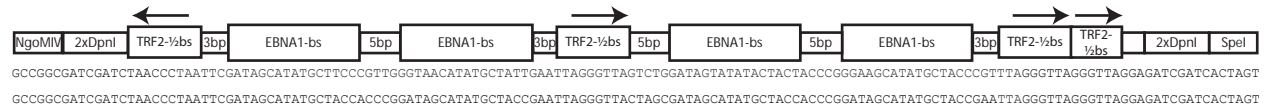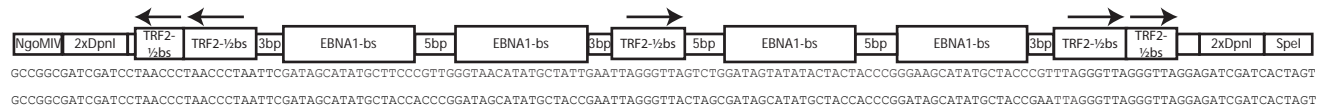

Supplement: supp_82_12_5693__1.pdf [file supp_82_12_5693__1.pdf]
